# Supplementary material
Source: PubMed Central journal article supplement (PMC2649617)
Supplement: org0302_0083SD1.pdf [file org0302_0083SD1.pdf]

Research Paper

# *Anxa4* Genes are Expressed in Distinct Organ Systems in *Xenopus laevis* and *tropicalis* But are Functionally Conserved

Karine L. Massé<sup>1,†</sup>  
Robert J. Collins<sup>2,†</sup>  
Surinder Bhamra<sup>1</sup>  
Rachel A. Seville<sup>2</sup>  
Elizabeth A. Jones<sup>1,\*</sup>

<sup>1</sup>Molecular Physiology Group; Department of Biological Sciences; <sup>2</sup>The Medical School; University of Warwick; Coventry, UK

<sup>†</sup>The authors contributed equally to this work.

\*Correspondence to: Elizabeth A. Jones; Molecular Physiology; Department of Biological Sciences; Warwick University; Coventry, CV4 7AL, United Kingdom; Tel.: +44.2476.522573 Fax : +44.2476.523701; Email: Elizabeth.Jones@warwick.ac.uk

Original manuscript submitted: 10/13/07  
Manuscript accepted: 11/12/07

This manuscript has been published online, prior to printing for Organogenesis, Volume 3, Issue 2. Definitive page numbers have not been assigned. The current citation is: Organogenesis 2007; 3(2):

<http://www.landesbioscience.com/journals/organogenesis/article/4945>

Once the issue is complete and page numbers have been assigned, the citation will change accordingly.

## KEY WORDS

annexin 4, kidney, liver, evolution, paralog and ortholog, *Xenopus laevis*, *Xenopus tropicalis*, morpholino, organogenesis

## ABBREVIATIONS

|         |                                        |
|---------|----------------------------------------|
| Anx     | Annexin                                |
| Anx4    | Annexin4                               |
| anxa4a  | <i>X. laevis</i> Annexin4              |
| Xt anx4 | <i>X. tropicalis</i> anx4              |
| anxa4b  | <i>X. laevis</i> annexin4 pseudoallele |
| sd      | standard deviation                     |

## ACKNOWLEDGEMENTS

We thank N. Ahmed for *X. laevis* genomic DNA, G. Rogers for assistance with confocal images and R. Taylor and P. Jarrett for maintenance of the breeding frogs. This work was supported by the BBSRC. The authors dedicate this work to the memory of Robert Taylor.

## SUPPLEMENTARY MATERIALS

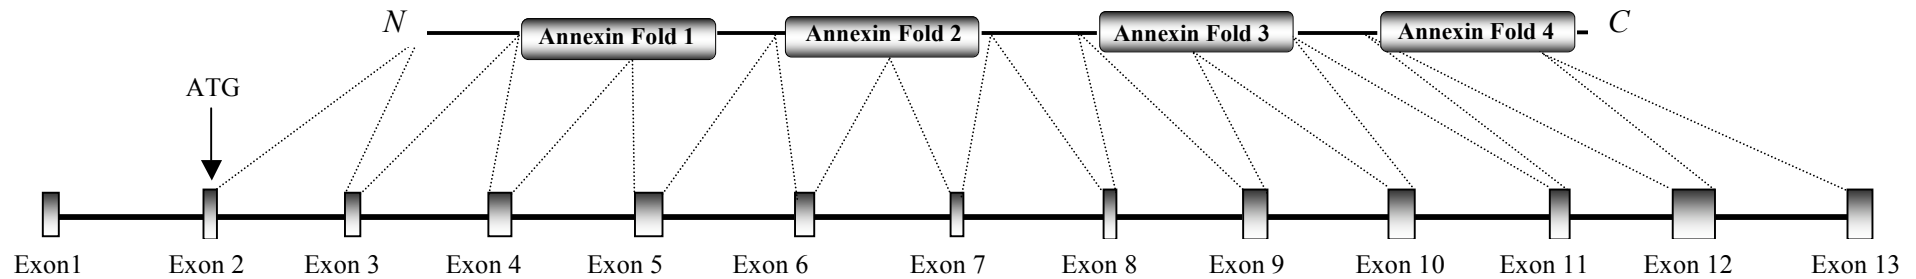

|                      | E1  | I1    | E2             | I2   | E3        | I3    | E4        | I4    | E5         | I5    | E6        | I6    | E7        | I7    | E8        | I8              | E9        | I9   | E10       | I10   | E11       | I11  | E12        | I12  | E13              |
|----------------------|-----|-------|----------------|------|-----------|-------|-----------|-------|------------|-------|-----------|-------|-----------|-------|-----------|-----------------|-----------|------|-----------|-------|-----------|------|------------|------|------------------|
| <i>X. laevis</i>     | 37  | >1400 | 55( <u>9</u> ) | 833  | <u>88</u> | 379   | <u>95</u> | ~1700 | <u>114</u> | ~2350 | <u>91</u> | ~1350 | <u>80</u> | ~1950 | <u>57</u> | ~4100<br>(5500) | <u>94</u> | ~700 | <u>96</u> | ~1100 | <u>59</u> | ~900 | <u>123</u> | 338  | 112( <u>60</u> ) |
| <i>X. tropicalis</i> | 45  | 8373  | 57( <u>9</u> ) | 744  | <u>88</u> | 375   | <u>95</u> | 1414  | <u>114</u> | 1273  | <u>91</u> | 784   | <u>80</u> | 396   | <u>57</u> | 2757            | <u>94</u> | 558  | <u>96</u> | 1328  | <u>59</u> | 2840 | <u>123</u> | 398  | 114( <u>60</u> ) |
| <i>H. sapiens</i>    | 26  | ND    | 59( <u>9</u> ) | 6479 | <u>88</u> | 16391 | <u>95</u> | 1757  | <u>114</u> | 1417  | <u>91</u> | 2597  | <u>80</u> | 1979  | <u>57</u> | 3391            | <u>94</u> | 2411 | <u>96</u> | 583   | <u>59</u> | 1359 | <u>123</u> | 4633 | 943( <u>60</u> ) |
| <i>M. musculus</i>   | 47  | 27640 | 49( <u>3</u> ) | 5004 | <u>88</u> | 2760  | <u>95</u> | 2850  | <u>114</u> | 959   | <u>91</u> | 1570  | <u>80</u> | 973   | <u>57</u> | 2080            | <u>94</u> | 4126 | <u>96</u> | 1447  | <u>59</u> | 1158 | <u>123</u> | 4011 | 911( <u>60</u> ) |
| <i>D. rerio</i>      | 257 | 10490 | 58( <u>9</u> ) | 2941 | <u>88</u> | 2869  | <u>95</u> | 5479  | <u>114</u> | 3480  | <u>91</u> | 99    | <u>80</u> | 446   | <u>57</u> | 1645            | <u>94</u> | 2203 | <u>96</u> | 80    | <u>59</u> | 76   | <u>123</u> | 2360 | 219( <u>60</u> ) |

**Supplementary Figure 1. Exon / intron organization of *anxa4* genes.** Exons are represented by shaded boxes and introns by a horizontal line. The total size in base pairs is given in the corresponding column. Coding sequences are underlined. Exon 2 contains the start codon (atg) and exon 13 contains the stop codon (taa). Sizes of exons 1 and 13 were determined by reference to the cDNA sequences (See Table 1 for Accession numbers). Each exon is positioned relative to the *anxa4* protein domains. Figures in *italics* are generated from size estimates obtained by reference to PCR amplified bands to size markers; these introns have not been fully sequenced. *X.laevis* intron 1 was never amplified by PCR but was located in the 5'UTR using the Universal Genome Walker kit (CLONTECH laboratories, Inc). Its exact size could not be determined. Genomic sequences for the human, mouse and zebrafish *anxa4* genes were identified by BLAST on the NCBI website. The Genbank accession numbers for these sequences are: *H.sapiens*, NT\_022184; *M.musculus*, NT\_039353 and *D.rerio*, NW\_001513125. *X.tropicalis anxa4* genomic sequences, located on the scaffold 143, were identified by BLAST on the JGI *Xenopus* website (<http://genome.jgi-psf.org/Xentr4/Xentr4.home.html>). ND, not determined.

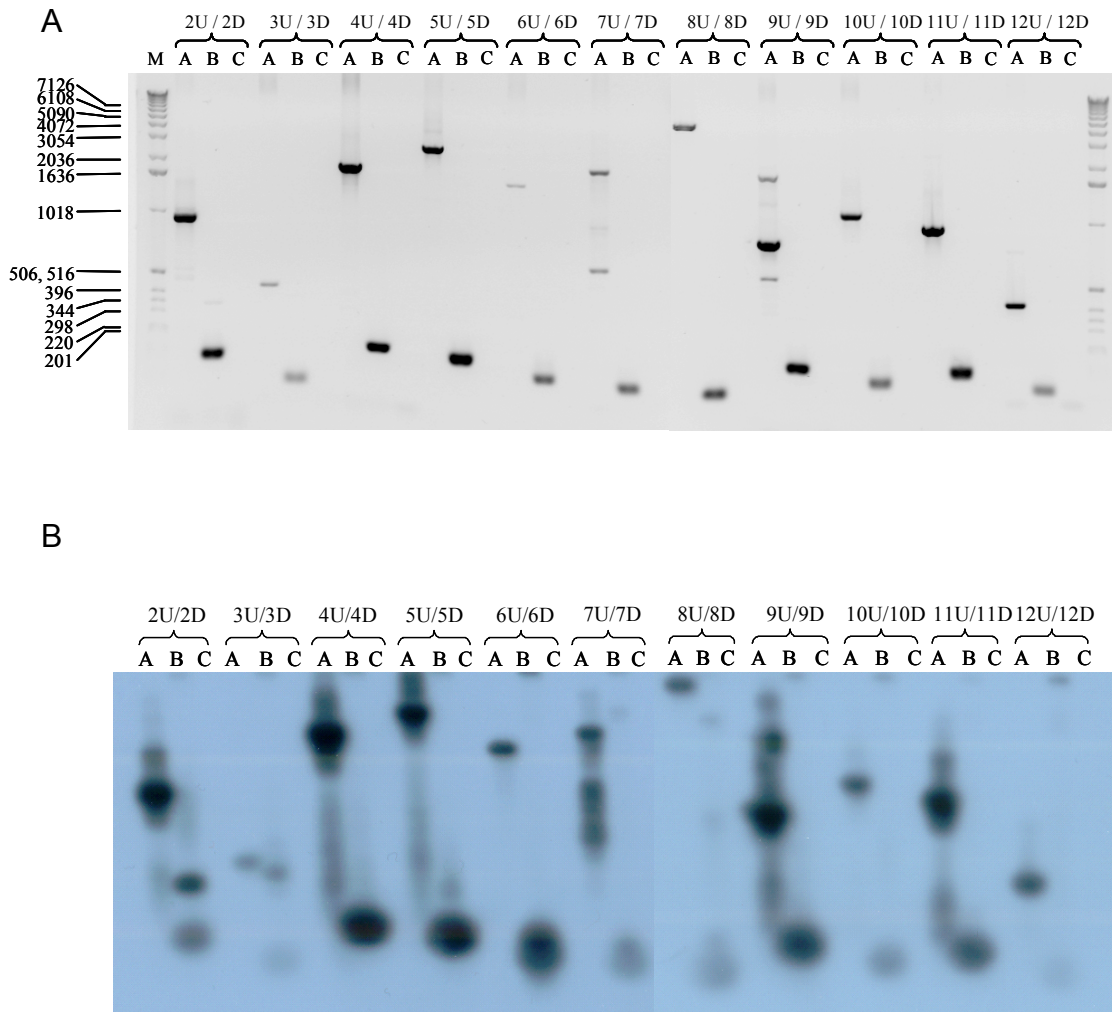

**Supplementary Figure 2. Identification of the *X. laevis anxa4* introns.**

(A) PCR amplification of introns 2 – 12 of *anxa4* gene.

The putative intron boundaries of the *Xenopus laevis anxa4* gene were predicted by reference to the organization of mammalian *anxa4* genes. Primers were designed complementary to exon sequence adjacent to the putative intron boundaries (Supplementary Table 1). Each intron was amplified by PCR from *X. laevis* genomic DNA extracted from adult blood. Each amplification was optimised by gradient PCR by modifying the MgCl<sub>2</sub> concentration and the annealing temperature. The optimized conditions used for each intronic amplification, are indicated in Supplementary Table 1. PCR was carried out using the Taq polymerase from Invitrogen and Expand Long Template PCR polymerase (intron 7). For each primer pair, lane A shows the amplified genomic fragment, lane B shows the amplified cDNA fragment and lane C shows the no DNA input control. M, 1Kb DNA marker (Invitrogen).

(B) Southern blot analysis of the PCR amplified intronic sequences using *anxa4a* cDNA labelled with  $\alpha^{32}$ P-dGTP. For each primer pair, lane A shows the amplified genomic fragment, lane B shows the amplified cDNA fragment and lane C shows the no DNA input control.

| Intron | Sequence at exon-intron junction |            |            |                    |                                                       |                 | Amino acid interrupted |
|--------|----------------------------------|------------|------------|--------------------|-------------------------------------------------------|-----------------|------------------------|
|        | 5' splice donor                  |            |            | 3' splice acceptor |                                                       |                 |                        |
| 2      | <i>Xl</i>                        | ATG        | GCA        | GCA                | <b>gt</b> aagatataaacct.....ttcctgttctat <b>ag</b>    | CTC GGA ACT AAG |                        |
|        | <i>Xt</i>                        | ATG        | GCA        | ACA                | <b>gt</b> aagtatgaacct.....tttctgttctct <b>ag</b>     | CTA GGA ACT AAG |                        |
|        | <i>Hs</i>                        | ATG        | GCC        | ATG                | <b>gt</b> aagttgtgaaat.....tcttgtgtgctc <b>ag</b>     | GCA ACC AAA GGA |                        |
|        | <i>Mm</i>                        |            |            | ATG                | <b>gt</b> gagtgccctcgcc.....ttctgtgccttc <b>ag</b>    | GAA GCC AAA GGA |                        |
|        | <i>Dr</i>                        | ATG        | GCA        | CGG                | <b>gt</b> aagtgaataaac.....tttttttactgt <b>ag</b>     | TTG GGA AAC CGT |                        |
| 3      | <i>Xl</i>                        | ATG        | AAA        | GGA GCA G          | <b>gt</b> gagtactagtagc.....cccctgtttct <b>ag</b>     | GC ACC GAT GAA  | Gly-33                 |
|        | <i>Xt</i>                        | ATG        | AAA        | GGA GCA G          | <b>gt</b> gagtactgatat.....gtgcccgtttct <b>ag</b>     | GC ACC GAT GAA  | Gly-33                 |
|        | <i>Hs</i>                        | ATG        | AAA        | GGG CTC G          | <b>gt</b> atgtgtcctgtct.....ccttcttcccc <b>ag</b>     | GC ACC GAT GAA  | Gly-33                 |
|        | <i>Mm</i>                        | ATG        | AAA        | GGC CTC G          | <b>gt</b> atgtactcttct.....catcttgtctcc <b>ag</b>     | GT ACT GAT GAA  | Gly-30                 |
|        | <i>Dr</i>                        | ATG        | AAA        | GGG GCA G          | <b>gt</b> gagagagacct.....aagctacttttc <b>ag</b>      | GT ACC AAC GAG  | Gly-33                 |
| 4      | <i>Xl</i>                        | ACT        | GTT        | GGA AAA            | <b>gt</b> aagtcraagccaa.....attatcattttt <b>ag</b>    | GAT CTT GAT GAT |                        |
|        | <i>Xt</i>                        | ACT        | ATT        | GGA AAA            | <b>gt</b> aagtcraaaccaa.....gttcttattttt <b>ag</b>    | GAT CTG GAG GAT |                        |
|        | <i>Hs</i>                        | ACC        | ATC        | GCC AGG            | <b>gt</b> aggccaacagctct.....ttccttgcaattgc <b>ag</b> | GAC TTG ATA GAC |                        |
|        | <i>Mm</i>                        | ACC        | ATT        | GCC AGG            | <b>gt</b> agggcccagctct.....ctcgtttgtttgc <b>ag</b>   | GAC CTG ATT GAG |                        |
|        | <i>Dr</i>                        | AGC        | GTG        | GGA AAG            | <b>gt</b> aaaacgtaaac.....aaacgctctttc <b>ag</b>      | GAA TTG ATG GAC |                        |
| 5      | <i>Xl</i>                        | AAA        | GCC        | ATG AAG            | <b>gt</b> gggtgttctgtg.....gctatggttttt <b>ag</b>     | GGT GCA GGG ACA |                        |
|        | <i>Xt</i>                        | AAA        | GCC        | ATG AAG            | <b>gt</b> gggtgttctgaa.....gtttgtttttc <b>ag</b>      | GGT GCA GGG ACA |                        |
|        | <i>Hs</i>                        | AGG        | GCC        | ATG AAG            | <b>gt</b> ctgtgtctcttcc.....ggtttcttgttt <b>ag</b>    | GGA GCC GGC ACT |                        |
|        | <i>Mm</i>                        | AGG        | GCC        | ATG AAG            | <b>gt</b> ctgtgtgtccct.....gcctcaccattt <b>ag</b>     | GGA GCT GGC ACG |                        |
|        | <i>Dr</i>                        | AAC        | GCC        | ATC AAG            | <b>gt</b> tagtgaggatag.....tattttgtgtct <b>ag</b>     | GGA GCA GGG ACG |                        |
| 6      | <i>Xl</i>                        | ACC        | TAC        | AAA ATA A          | <b>gt</b> aagtattataaa.....tttctgctttgc <b>ag</b>     | AA TAT GGT AAA  | Lys-133                |
|        | <i>Xt</i>                        | <b>ACC</b> | <b>TAC</b> | <b>AGA</b> ATA A   | <b>gt</b> aagttagaaaaag.....tttttgcaattac <b>ag</b>   | AA TAT GGT AAA  | Lys-133                |
|        | <i>Hs</i>                        | ACC        | TAC        | CAG CAG C          | <b>gt</b> acgtgacatccg.....cactctcttgc <b>ag</b>      | AA TAT GGA CGG  | Gln-133                |
|        | <i>Mm</i>                        | ACA        | TAC        | CAG CAG C          | <b>gt</b> aagtagcagccc.....caattttttggt <b>ag</b>     | AA TAT GGA AGG  | Gln-131                |
|        | <i>Dr</i>                        | <b>GCT</b> | <b>TAC</b> | <b>AAG</b> AAA G   | <b>gt</b> gcatgctagtta.....ccctcattactc <b>ag</b>     | AA CAT GCA AAG  | Glu-133                |
| 7      | <i>Xl</i>                        | TCT        | TTG        | GCT GCT            | <b>gt</b> aagtaccacaac.....ttgttcatttgc <b>ag</b>     | GGT GGG AGA GAC |                        |
|        | <i>Xt</i>                        | TCT        | TTG        | GCT GCT            | <b>gt</b> aagtaccacaac.....gcattcctttgc <b>ag</b>     | GGT GGG AGA GAC |                        |
|        | <i>Hs</i>                        | TCT        | CTG        | TCA GCT            | <b>gt</b> gagtgactgtct.....tttctcactcct <b>ag</b>     | GGT GGG AGG GAT |                        |
|        | <i>Mm</i>                        | TTC        | CTG        | TCG GCG            | <b>gt</b> gctgtgtcttct.....ccatcttcccac <b>ag</b>     | GCT GGC AGG GAT |                        |
|        | <i>Dr</i>                        | TCA        | TTG        | CTC ACG            | <b>gt</b> aaataaacaat.....tgctttgtttac <b>ag</b>      | GCT GGG CGT GAC |                        |
| 8      | <i>Xl</i>                        | CAA        | GAT        | GCC AAT            | <b>gt</b> aagtcagtctat.....cactttcttctc <b>ag</b>     | GAC CTA TAT GAA |                        |
|        | <i>Xt</i>                        | CAG        | GAT        | GCC AAT            | <b>gt</b> aagtcagtctat.....tactttcttctc <b>ag</b>     | GAA CTA TAT GAA |                        |
|        | <i>Hs</i>                        | CAG        | GAT        | GCC CAG            | <b>gt</b> tggtagaactgc.....ttgtttggttcc <b>ag</b>     | GAC CTG TAT GAG |                        |
|        | <i>Mm</i>                        | CAG        | GAT        | GCC CAG            | <b>gt</b> ttgtggaccgca.....ttgtttgcatc <b>ag</b>      | GAA CTG TAT GAG |                        |
|        | <i>Dr</i>                        | CAG        | GAC        | GCA AAG            | <b>gt</b> gaggattttgac.....ttatgctttatc <b>ag</b>     | GAC ATC TAT GAG |                        |
| 9      | <i>Xl</i>                        | CAC        | TTA        | CTG AAA G          | <b>gt</b> gagcatgtgaga.....gcttttttctc <b>ag</b>      | TT TTT GAA GAG  | Val-210                |
|        | <i>Xt</i>                        | CAC        | TTG        | CTG AAG G          | <b>gt</b> gagcttatctcc.....ggttttattctc <b>ag</b>     | TT TTT GAT GAA  | Val-210                |
|        | <i>Hs</i>                        | CAC        | CTG        | TTG CAT G          | <b>gt</b> aaggcacttact.....gttattgtctgc <b>ag</b>     | TG TTT GAT GAA  | Val-210                |
|        | <i>Mm</i>                        | CAT        | CTG        | CTC CAC G          | <b>gt</b> gggtagcccacct.....gttattgtctac <b>ag</b>    | TG TTT GAT GAA  | Val-208                |
|        | <i>Dr</i>                        | GCC        | CTT        | CTG CGA G          | <b>gt</b> aaacacagtaaa.....ctgtttttccc <b>ag</b>      | TG TTT CAG GAG  | Val-210                |
| 10     | <i>Xl</i>                        | CTT        | TTG        | GCA ATC G          | <b>gt</b> aagtatgtcagg.....tctttgccttgc <b>ag</b>     | TG AAA TGC ATA  | Val-242                |
|        | <i>Xt</i>                        | CTT        | TTG        | GCA GTC G          | <b>gt</b> gagtagcttagg.....tctttgccttgc <b>ag</b>     | TG AAA TGC TTG  | Val-242                |
|        | <i>Hs</i>                        | CTG        | CTG        | GCT ATA G          | <b>gt</b> aagctggttaggg.....ttttctttgac <b>ag</b>     | TA AAG TGC ATG  | Val-242                |
|        | <i>Mm</i>                        | CTG        | TTG        | GCT ATA G          | <b>gt</b> aagctggtgagc.....cgttttctccac <b>ag</b>     | TG AAG TGC ATG  | Val-240                |
|        | <i>Dr</i>                        | TTT        | CTG        | GCA ATA G          | <b>gt</b> cagcgttagtgc.....gtttgccttttc <b>ag</b>     | TG AAA GTC ATA  | Val-242                |
| 11     | <i>Xl</i>                        | AAA        | TCT        | ATG AAG            | <b>gt</b> gagtgctttttt.....cttctgttttgc <b>ag</b>     | GGT CTG GGG ACA |                        |
|        | <i>Xt</i>                        | AAA        | TCT        | ATG AAG            | <b>gt</b> gagccctttttt.....cttctgttttgc <b>ag</b>     | GGT CTG GGG ACA |                        |
|        | <i>Hs</i>                        | AAA        | TCG        | ATG AAG            | <b>gt</b> aatggcctttat.....gttttcttctt <b>ag</b>      | GGC TTG GGC ACC |                        |
|        | <i>Mm</i>                        | AAA        | TCC        | ATG AAG            | <b>gt</b> aagcagctgtgc.....actccttctct <b>ag</b>      | GGC TTA GGC ACT |                        |
|        | <i>Dr</i>                        | AAG        | TCA        | ATG AAG            | <b>gt</b> acacaaaatcac.....atatcatttctt <b>ag</b>     | GGT TTA GGG ACT |                        |
| 12     | <i>Xl</i>                        | TCA        | TTT        | ATT AAG            | <b>gt</b> gagagaagaatt.....tttgtttccgc <b>ag</b>      | GGT GAC TGC TCG |                        |
|        | <i>Xt</i>                        | <b>TCC</b> | <b>TTT</b> | <b>ATT</b> AAG     | <b>gt</b> aagagaggaatt.....ttttgtttctgc <b>ag</b>     | GGT GAC TGC TCT |                        |
|        | <i>Hs</i>                        | TCG        | TTC        | ATC AAG            | <b>gt</b> aggtcacagcag.....tccctatcgaa <b>ag</b>      | GGT GAC ACA TCT |                        |
|        | <i>Mm</i>                        | TCT        | TTC        | ATC AAG            | <b>gt</b> aggaacatcatc.....ctcctttctcc <b>ag</b>      | GGT GAC ACT TCC |                        |
|        | <i>Dr</i>                        | <b>TCC</b> | <b>TTT</b> | <b>ATA</b> AAG     | <b>gt</b> gagacattacac.....ttgtctttttc <b>ag</b>      | GGC GAC ACG TCG |                        |

### Supplementary Figure 3: Exon / intron splice junctions of *anxa4* gene sequences.

Each intronic amplification was ligated into pGEMt-easy as recommended by the manufacturer (Promega, UK) and confirmed as *anxa4* genomic sequences by in-house sequencing. Intronic boundaries were identified by alignment between the genomic and cDNA sequences and according to the intron/exon boundary consensus sequences (Breathnach and Chambon, 1981). Sequences at the exon/intron boundaries from different species were compared by alignment. Shading represents conservation between species at this base in two or more of the presented intronic sequences. Intronic boundaries **gt...ag** are shown in bold. *Xl*, *Xenopus laevis*; *Xt*, *Xenopus tropicalis*; *Hs*, *Homo sapiens*; *Mm*, *Mus musculus*; *Dr*, *Danio rerio*.

Breathnach, R. and Chambon, P. Organization and expression of eucaryotic split genes coding for proteins. *Annu Rev Biochem* 1981; 50:349-83.

**Supplementary Table 1. Primers designed to amplify up *X. laevis anxa4* introns**

| <b>Intron</b> | <b>Sequence</b>                                    | <b>Optimum [MgCl<sub>2</sub>]</b> | <b>Optimum Temperature (°C)</b> | <b>Cycles</b> |                                    |
|---------------|----------------------------------------------------|-----------------------------------|---------------------------------|---------------|------------------------------------|
| 2             | U-CAGCCGACATCTGCTTAGAA<br>D-CCTTTCATGGCGTTCCTCAG   | 3mM                               | 60                              | 30            | This work                          |
| 3             | U-CTGAGGAACGCCATGAAAGG<br>D-GCAATGACGTCAATGAC      | 7.5mM                             | 60                              | 30            | This work                          |
| 4             | U-GTCATTGACGTCATTGC<br>D-GTTCCTCCACATCATAGAGA      | 5mM                               | 60                              | 30            | This work                          |
| 5             | U-CCGAACAGCAGGGAACCTT<br>D-TCTCCTCTGCGCTGCGAGAT    | 3mM                               | 60                              | 30            | This work                          |
| 6             | U-TCTCGCAGCGCAGAGGAGAT<br>D-CTCTCTGGAACATGAAAGAC   | 5mM                               | 60                              | 30            | This work                          |
| 7             | U-GGAGGACGATATTTGCTCAG<br>D-TCATTCACGGTGCTGCTCTG   | 1.5mM                             | 60                              | 30            | This work<br>Seville et al. (2002) |
| 9             | U-CAGAGCAGCACCGTGAATGA<br>D-CCACTTCTTCTCACC GGCTT  | 4mM                               | 60                              | 30            | This work                          |
| 10            | U-AAGCCGGTGAGAAGAAGTGG<br>D-GTGTCCCAGACATTTCAAGATT | 3mM                               | 60                              | 30            | This work                          |
| 11            | U-AGATCTTGAGGCCAGTATAA<br>D-CAATCGTTCTGCAAAGTAGG   | 5mM                               | 60                              | 30            | This work                          |
| 12            | U-AAGAGCAGGCCAGCCTACTT<br>D-TCTTGAACTCGCAGCGGATT   | 1.5mM                             | 60                              | 30            | This work                          |
| 13            | U-TCCGCTGCGAGTTCAAGAAG<br>D-GAGCACCTTCCTGTAATCTC   | 3mM                               | 60                              | 30            | This work                          |
